# Supplementary material for: Genotypic Variation in the Root and Shoot Metabolite Profiles of Wheat (Triticum aestivum L.) Indicate Sustained, Preferential Carbon Allocation as a Potential Mechanism in Phosphorus Efficiency
Source: Front Plant Sci. 2019 Aug 6;10:995. doi: 10.3389/fpls.2019.00995 (PMC6691131; doi:10.3389/fpls.2019.00995)
Supplement: TABLE S1 — Basal nutrient mix (mg kg–1 soil) added to the growth medium. [file Table_1.docx]

Supplementary Material

Genotypic variation in the root and shoot metabolite profiles of wheat (*Triticum aestivum*) indicate sustained, preferential carbon allocation as a potential mechanism in phosphorus efficiency

Van Lam Nguyen1, 2, Lachlan Palmer1, Ute Roessner3 and James Stangoulis1*

1College of Science and Engineering, Flinders University, Sturt Rd, Bedford Park SA 5042, Australia.

2Department of Biochemistry and Food Biotechnology, Vietnam National University of Agriculture, Trau Quy, Gia Lam, Hanoi, Vietnam.

3School of BioSciences, The University of Melbourne, 3010 Victoria, Australia.

***Correspondence:** James Stangoulis

Email: [james.stangoulis@flinders.edu.au](mailto:james.stangoulis@flinders.edu.au)

Postal address: GPO Box 2100, Adelaide 5001, South Australia

Table S 1. Basal nutrient mix (mg kg-1 soil) added to the growth medium

| Nutrient | Concentration |
| --- | --- |
| Ca(NO3)2.4H2O | 918 |
| K2SO4 | 113.6 |
| MgSO4.7H2O | 140 |
| FeSO4.7H2O | 1.4 |
| Na2MoO4.2H2O | 0.61 |
| CuSO4.5H2O | 2.25 |
| MnSO4.4H2O | 3.68 |
| ZnSO4.7H2O | 6.6 |
| H3BO3 | 0.28 |
| KH2PO4 | 5*, 10, 30 |

*only used for the exudate experiment.

Table S 2. Separation conditions used for HPIC analysis of organic acids

| Time (min) | KOH (mM) | Methanol (%) | Comment |
| --- | --- | --- | --- |
| 0 | 1 | 10 | Injection, analysis start |
| 8 | 1 | 10 | End of isocratic section, start of first gradient |
| 18 | 15 | 20 | End of first gradient, start of second gradient |
| 28 | 30 | 20 | End of second gradient, start of third gradient |
| 38 | 60 | 10 | End of third gradient |
| 38 | 100 | 10 | Start of column wash |
| 42 | 100 | 10 | End of column wash |
| 42 | 1 | 10 | Start of equilibration |
| 47 | 1 | 10 | End of equilibration, end of run |

Table S 3. Fold-change in metabolite levels in leaves of efficient (RAC875) and inefficient (Wyalkatchem). Comparisons between low P supply and adequate P supply (low P/adequate P); and between RAC875 and Wyalkatchem (RAC875/Wyalkatchem) at each P supply. R: RAC875; W: Wyalkatchem; Low P: 10 mg P kg-1 soil (P10), adequate P: 30 mg P kg-1 soil (P30); sem: standard error of the mean (n=4 biological replications). * significant at P<0.05 (t-test).

| Metabolite | Low P/adequate P | | | | RAC875/Wyalkatchem | | | |
| --- | --- | --- | --- | --- | --- | --- | --- | --- |
| RAC875 | | Wyalkatchem | | P10 | | P30 | |
| P10/ P30 | sem | P10/ P30 | sem | R/W | sem | R/W | sem |
| Amino Acids and Amines |  |  |  |  |  |  |  |  |
| 4-amino-butyric acid | 0.431 | 0.332 | 0.653 | 0.245 | 1.274 | 0.332 | 1.930 | 0.236 |
| Adenine | 0.791 | 0.071 | 0.856 | 0.118 | 1.097 | 0.071 | 1.188 | 0.074 |
| Alanine | 0.931 | 0.089 | 0.700* | 0.112 | 1.174 | 0.089 | 0.883 | 0.047 |
| Aspartic acid | 0.805 | 0.024 | 0.843 | 0.058 | 1.180* | 0.024 | 1.236 | 0.134 |
| beta-alanine | 1.061 | 0.113 | 0.867 | 0.159 | 1.727* | 0.113 | 1.410* | 0.012 |
| Cytosine | 0.922 | 0.102 | 1.270 | 0.074 | 0.883 | 0.102 | 1.217 | 0.096 |
| Ethanolamine | 0.987 | 0.218 | 0.795 | 0.077 | 1.010 | 0.218 | 0.813 | 0.058 |
| Glutamic acid | 0.878 | 0.085 | 0.981 | 0.083 | 1.066 | 0.085 | 1.190 | 0.150 |
| Glutamine | 0.724 | 0.185 | 0.489 | 0.170 | 1.958* | 0.185 | 1.322 | 0.145 |
| Glycine | 0.790 | 0.150 | 0.644 | 0.154 | 1.185 | 0.150 | 0.966 | 0.223 |
| Guanine | 1.211 | 0.082 | 1.133 | 0.036 | 1.027 | 0.082 | 0.961 | 0.078 |
| Guanosine | 1.102 | 0.057 | 0.768 | 0.067 | 1.418* | 0.057 | 0.988 | 0.061 |
| Homoserine | 0.945 | 0.218 | 0.702 | 0.212 | 1.145 | 0.218 | 0.850 | 0.303 |
| Isoleucine | 1.145 | 0.238 | 0.904 | 0.252 | 1.066 | 0.238 | 0.842 | 0.215 |
| N-acetyl serine | 0.589* | 0.064 | 0.912 | 0.143 | 0.695 | 0.064 | 1.075 | 0.124 |
| Phenylalanine | 1.026 | 0.066 | 0.977 | 0.116 | 0.848 | 0.066 | 0.807 | 0.110 |
| Proline | 0.812 | 0.527 | 0.795 | 0.354 | 1.772 | 0.527 | 1.735 | 0.327 |
| Putrescine | 0.856 | 0.137 | 0.698* | 0.075 | 0.780 | 0.137 | 0.636* | 0.089 |
| Pyroglutamic acid | 0.529* | 0.093 | 0.560 | 0.293 | 0.848 | 0.093 | 0.897 | 0.058 |
| Serine | 0.704 | 0.236 | 0.792 | 0.191 | 0.828 | 0.236 | 0.932 | 0.260 |
| Threonine | 0.775 | 0.083 | 0.715 | 0.118 | 1.172 | 0.083 | 1.081 | 0.096 |
| Uracil | 0.719 | 0.114 | 1.036 | 0.131 | 0.854 | 0.114 | 1.231 | 0.065 |
| Valine | 0.925 | 0.150 | 0.829 | 0.148 | 1.114 | 0.150 | 0.999 | 0.179 |
| Organic Acids |  |  |  |  |  |  |  |  |
| 2- oxo-glutaric acid | 1.259 | 0.086 | 0.778 | 0.107 | 1.288 | 0.086 | 0.796 | 0.090 |
| 2-methyl Maleic acid/Fumaric acid | 0.854 | 0.043 | 1.240 | 0.049 | 0.909 | 0.043 | 1.319 | 0.079 |
| 4-hydroxy-benzoic acid | 0.607* | 0.095 | 1.059 | 0.140 | 0.758 | 0.095 | 1.322 | 0.035 |

Table S 3. Fold-change in metabolite levels in leaves of efficient (RAC875) and inefficient (Wyalkatchem). Comparisons between low P supply and adequate P supply (low P/adequate P); and between RAC875 and Wyalkatchem (RAC875/Wyalkatchem) at each P supply. R: RAC875; W: Wyalkatchem; Low P: 10 mg P kg-1 soil (P10), adequate P: 30 mg P kg-1 soil (P30); sem: standard error of the mean (n=4 biological replications). Blue color: significant at P<0.05 (t-test) (continue)

| Metabolite | Low P/adequate P | | | | RAC875/Wyalkatchem | | | |
| --- | --- | --- | --- | --- | --- | --- | --- | --- |
| RAC875 | | Wyalkatchem | | P10 | | P30 | |
| P10/ P30 | sem | P10/ P30 | sem | R/W | sem | R/W | sem |
| Aconitic acid | 1.334* | 0.039 | 1.304* | 0.053 | 0.985 | 0.039 | 0.963 | 0.088 |
| Benzoic acid | 0.878* | 0.029 | 0.990 | 0.046 | 0.975 | 0.029 | 1.099 | 0.028 |
| Caffeic acid | 0.941 | 0.067 | 1.147 | 0.152 | 0.823 | 0.067 | 1.003 | 0.017 |
| Citric acid | 0.714 | 0.133 | 0.920 | 0.155 | 0.897 | 0.133 | 1.156 | 0.262 |
| Ferulic acid | 1.094 | 0.143 | 1.232 | 0.151 | 1.129 | 0.143 | 1.271 | 0.070 |
| Aconitic acid | 1.334* | 0.039 | 1.304* | 0.053 | 0.985 | 0.039 | 0.963 | 0.088 |
| Benzoic acid | 0.878* | 0.029 | 0.990 | 0.046 | 0.975 | 0.029 | 1.099 | 0.028 |
| Caffeic acid | 0.941 | 0.067 | 1.147 | 0.152 | 0.823 | 0.067 | 1.003 | 0.017 |
| Citric acid | 0.714 | 0.133 | 0.920 | 0.155 | 0.897 | 0.133 | 1.156 | 0.262 |
| Ferulic acid | 1.094 | 0.143 | 1.232 | 0.151 | 1.129 | 0.143 | 1.271 | 0.070 |
| Fumaric acid | 1.205 | 0.074 | 1.231 | 0.056 | 0.976 | 0.074 | 0.997 | 0.053 |
| Glyceric acid | 0.997 | 0.062 | 1.100 | 0.079 | 1.025 | 0.062 | 1.131 | 0.111 |
| Glyceric acid-3-phosphate | 1.172 | 0.188 | 0.685 | 0.252 | 0.991 | 0.188 | 0.579* | 0.190 |
| Glycolic acid | 0.909 | 0.032 | 1.104 | 0.033 | 0.941 | 0.032 | 1.143 | 0.045 |
| Iso Citric | 1.228* | 0.051 | 1.055 | 0.069 | 1.125 | 0.051 | 0.966 | 0.051 |
| Itaconate | 0.953 | 0.082 | 1.579* | 0.065 | 0.750* | 0.082 | 1.243 | 0.115 |
| Malic acid | 1.150 | 0.046 | 1.144 | 0.039 | 0.940 | 0.046 | 0.936 | 0.110 |
| Malonic acid | 1.647* | 0.172 | 1.185 | 0.123 | 1.032 | 0.172 | 0.743 | 0.075 |
| Oxalic acid | 1.203 | 0.275 | 1.247 | 0.239 | 1.041 | 0.275 | 1.079 | 0.236 |
| Qunic acid | 2.861* | 0.191 | 1.226 | 0.230 | 0.899 | 0.191 | 0.385* | 0.191 |
| Saccharic acid | 1.621* | 0.135 | 1.166 | 0.174 | 1.064 | 0.135 | 0.765 | 0.107 |
| Shikimic acid | 1.555* | 0.019 | 1.178* | 0.041 | 0.999 | 0.019 | 0.757* | 0.060 |
| Sinapic acid | 0.886 | 0.060 | 1.119 | 0.082 | 0.647* | 0.060 | 0.818 | 0.145 |
| Succinic acid | 1.023 | 0.071 | 0.848 | 0.108 | 0.965 | 0.071 | 0.800 | 0.075 |
| Threonic acid | 1.199 | 0.093 | 0.939 | 0.160 | 1.101 | 0.093 | 0.862 | 0.055 |
| Sugars, Sugar Alcohol and Sugar Phosphates |  |  |  |  |  |  |  |  |
| Arabinose | 1.015 | 0.043 | 1.101 | 0.029 | 0.945 | 0.043 | 1.025 | 0.009 |
| Arabitol | 0.746 | 0.187 | 1.197 | 0.143 | 0.969 | 0.187 | 1.554* | 0.124 |
| Beta Gentibiose | 1.032 | 0.178 | 1.099 | 0.088 | 1.111 | 0.178 | 1.183 | 0.097 |
| Erythritol | 0.894 | 0.078 | 1.126 | 0.122 | 1.127 | 0.078 | 1.419* | 0.037 |
| Fructose | 0.893 | 0.306 | 1.047 | 0.340 | 0.935 | 0.306 | 1.096 | 0.330 |

Table S 3. Fold-change in metabolite levels in leaves of efficient (RAC875) and inefficient (Wyalkatchem). Comparisons between low P supply and adequate P supply (low P/adequate P); and between RAC875 and Wyalkatchem (RAC875/Wyalkatchem) at each P supply. R: RAC875; W: Wyalkatchem; Low P: 10 mg P kg-1 soil (P10), adequate P: 30 mg P kg-1 soil (P30); sem: standard error of the mean (n=4 biological replications). * significant at P<0.05 (t-test) (continue)

| Metabolite | Low P/adequate P | | | | RAC875/Wyalkatchem | | | |
| --- | --- | --- | --- | --- | --- | --- | --- | --- |
| RAC875 | | Wyalkatchem | | P10 | | P30 | |
| P10/ P30 | sem | P10/ P30 | sem | R/W | sem | R/W | sem |
| Fructose-6-phosphate | 0.774 | 0.275 | 0.581* | 0.201 | 1.381 | 0.275 | 1.036 | 0.225 |
| Galactinol | 1.306* | 0.039 | 0.884 | 0.089 | 1.107 | 0.039 | 0.749 | 0.110 |
| Galactitol | 0.781 | 0.234 | 0.967 | 0.157 | 0.725 | 0.234 | 0.898 | 0.199 |
| Galactonic acid | 0.878 | 0.123 | 0.992 | 0.019 | 0.720* | 0.123 | 0.813* | 0.071 |
| Galactose | 0.990 | 0.191 | 1.177 | 0.144 | 0.788 | 0.191 | 0.936 | 0.100 |
| Gluconate | 0.956 | 0.149 | 1.041 | 0.149 | 1.114 | 0.149 | 1.212 | 0.094 |
| Gluconate-6-phosphate | 1.603 | 0.388 | 0.620 | 0.331 | 1.254 | 0.388 | 0.485 | 0.468 |
| Glucose | 0.980 | 0.191 | 1.012 | 0.256 | 1.134 | 0.191 | 1.171 | 0.224 |
| Glucose-6-phosphate | 0.875 | 0.295 | 0.560 | 0.243 | 1.353 | 0.295 | 0.865 | 0.168 |
| Maltose | 1.433 | 0.269 | 0.623 | 0.204 | 1.840 | 0.269 | 0.800 | 0.384 |
| Manitol | 0.643 | 0.106 | 0.858 | 0.319 | 0.397 | 0.106 | 0.530 | 0.177 |
| Manose | 0.894 | 0.144 | 0.861 | 0.159 | 1.185 | 0.144 | 1.141 | 0.076 |
| myo-Inositol | 0.983 | 0.038 | 1.018 | 0.101 | 1.062 | 0.038 | 1.099 | 0.062 |
| Raffinose | 1.101 | 0.097 | 0.972 | 0.310 | 1.031 | 0.097 | 0.910 | 0.176 |
| Ribitol | 0.981 | 0.035 | 1.006 | 0.060 | 0.941 | 0.035 | 0.965 | 0.070 |
| Ribose | 0.765* | 0.065 | 0.975 | 0.131 | 1.029 | 0.065 | 1.311 | 0.088 |
| Sucrose | 0.960 | 0.070 | 0.979 | 0.155 | 0.945 | 0.070 | 0.964 | 0.114 |
| Threitol | 0.755 | 0.191 | 1.086 | 0.152 | 1.232 | 0.191 | 1.773* | 0.134 |
| Trehelose | 1.254 | 0.034 | 0.884 | 0.093 | 1.248 | 0.034 | 0.880 | 0.098 |
| Xylitol | 0.756 | 0.148 | 0.961 | 0.092 | 1.374 | 0.148 | 1.746* | 0.090 |
| Xylose | 1.336* | 0.061 | 1.138 | 0.031 | 1.248* | 0.061 | 1.063 | 0.019 |
| Others |  |  |  |  |  |  |  |  |
| Glycerol | 1.139 | 0.096 | 0.595 | 0.102 | 0.887 | 0.096 | 0.464* | 0.144 |
| Hexadecanoic acid | 1.185 | 0.070 | 1.047 | 0.054 | 1.082 | 0.070 | 0.956 | 0.022 |
| Monomethylphosphate | 0.851 | 0.098 | 0.867 | 0.165 | 0.996 | 0.098 | 1.015 | 0.056 |
| Octadecanoic acid | 1.056 | 0.033 | 1.043 | 0.027 | 1.050 | 0.033 | 1.036 | 0.035 |
| Octadecatrienoic acid | 2.227* | 0.160 | 1.312 | 0.201 | 1.024 | 0.160 | 0.603 | 0.142 |
| Phosphoric acid | 0.844 | 0.184 | 0.526 | 0.297 | 1.189 | 0.184 | 0.740 | 0.236 |
| Threonic acid-1,4-lactone | 0.918 | 0.052 | 0.856 | 0.051 | 0.996 | 0.052 | 0.929 | 0.118 |

Table S 4. Fold-change in metabolite levels in roots of efficient (RAC875) and inefficient (Wyalkatchem). Comparisons between low P supply and adequate P supply (low P/adequate P); and between RAC875 and Wyalkatchem (RAC875/Wyalkatchem) at each P supply. R: RAC875; W: Wyalkatchem; Low P: 10 mg P kg-1 soil (P10), adequate P: 30 mg P kg-1 soil (P30); sem: standard error of the mean (n=4 biological replications). * significant at P<0.05 (t-test); ** significant at P<0.05 with Bonferroni correction.

| Metabolite | | Low P/adequate P | | | | RAC875/Wyalkatchem | | | |
| --- | --- | --- | --- | --- | --- | --- | --- | --- | --- |
| RAC875 | | Wyalkatchem | | P10 | | P30 | |
| P10/ P30 | sem | P10/ P30 | sem | R/W | sem | R/W | sem |
| Amino Acids and Amines |  | |  |  |  |  |  |  |  |
| Alanine | 0.881 | | 0.144 | 1.009 | 0.097 | 0.720 | 0.144 | 0.825 | 0.132 |
| Alanine, beta- | 1.269 | | 0.051 | 1.122 | 0.040 | 0.996 | 0.051 | 0.881 | 0.133 |
| Allantoin | 1.204 | | 0.182 | 2.108* | 0.128 | 0.874 | 0.182 | 1.531 | 0.219 |
| Asparagine | 0.772 | | 0.274 | 1.057 | 0.236 | 0.901 | 0.274 | 1.233 | 0.190 |
| Aspartic acid | 0.795 | | 0.108 | 0.889 | 0.061 | 0.804 | 0.108 | 0.899 | 0.140 |
| Butyric acid, 4-amino- | 0.891 | | 0.092 | 0.958 | 0.067 | 1.223 | 0.092 | 1.314 | 0.171 |
| Cytosine | 0.871 | | 0.031 | 0.945 | 0.064 | 0.915 | 0.031 | 0.993 | 0.124 |
| Ethanolamine | 0.822 | | 0.152 | 0.853 | 0.074 | 1.088 | 0.152 | 1.129 | 0.199 |
| Glutamine | 0.818 | | 0.552 | 0.913 | 0.188 | 0.829 | 0.552 | 0.925 | 0.357 |
| Glycine | 0.979 | | 0.050 | 1.128 | 0.057 | 0.898 | 0.050 | 1.034 | 0.117 |
| Guanine | 0.867 | | 0.118 | 1.180 | 0.094 | 0.912 | 0.118 | 1.241 | 0.145 |
| Guanosine | 1.756 | | 0.173 | 1.261 | 0.173 | 1.098 | 0.173 | 0.788 | 0.218 |
| Homoserine | 0.976 | | 0.105 | 0.946 | 0.070 | 1.052 | 0.105 | 1.021 | 0.162 |
| Isoleucine | 1.013 | | 0.068 | 1.084 | 0.074 | 0.914 | 0.068 | 0.978 | 0.187 |
| Leucine | 1.008 | | 0.105 | 1.171 | 0.054 | 0.914 | 0.105 | 1.062 | 0.188 |
| Lysine | 1.009 | | 0.109 | 1.183 | 0.109 | 0.930 | 0.109 | 1.091 | 0.180 |
| O-acetyl Serine | 0.712 | | 0.116 | 0.794* | 0.073 | 1.102 | 0.116 | 1.228 | 0.111 |
| Phenylalanine | 1.067 | | 0.047 | 1.057 | 0.048 | 1.014 | 0.047 | 1.005 | 0.155 |
| Proline | 0.911 | | 0.153 | 0.844 | 0.072 | 1.078 | 0.153 | 0.999 | 0.137 |
| Putrescine | 0.936 | | 0.165 | 0.762 | 0.206 | 0.869 | 0.165 | 0.708 | 0.164 |
| Pyroglutamic acid | 0.892 | | 0.114 | 0.747 | 0.060 | 1.348 | 0.114 | 1.130 | 0.152 |
| Serine | 0.745* | | 0.090 | 0.815 | 0.055 | 1.117 | 0.090 | 1.221 | 0.090 |
| Threonine | 0.801 | | 0.061 | 0.835* | 0.046 | 1.064 | 0.061 | 1.110 | 0.115 |
| Tyrosine | 0.926 | | 0.105 | 0.924 | 0.080 | 1.085 | 0.105 | 1.083 | 0.184 |
| Uracil | 0.478* | | 0.167 | 1.055 | 0.222 | 0.565 | 0.167 | 1.247 | 0.167 |
| Valine | 0.914 | | 0.090 | 0.938 | 0.056 | 1.071 | 0.090 | 1.099 | 0.136 |
| Organic Acids |  | |  |  |  |  |  |  |  |
| 4-Hydroxycinnamic acid | 0.800 | | 0.088 | 1.091 | 0.074 | 0.888 | 0.088 | 1.211 | 0.145 |
| Citric acid | 1.199 | | 0.046 | 1.082 | 0.064 | 1.076 | 0.046 | 0.972 | 0.067 |
| Ferulic acid, trans- | 0.652 | | 0.097 | 1.122 | 0.093 | 0.667* | 0.097 | 1.148 | 0.139 |
| Fumaric acid | 1.075 | | 0.110 | 1.079 | 0.057 | 0.704* | 0.110 | 0.706 | 0.164 |
| Galactonic acid | 1.070 | | 0.053 | 1.342* | 0.015 | 0.600 ** | 0.053 | 0.752 | 0.090 |
| Gluconate | 1.042 | | 0.101 | 1.368* | 0.056 | 0.848 | 0.101 | 1.113 | 0.206 |

Table S 4. Fold-change in metabolite levels in roots of efficient (RAC875) and inefficient (Wyalkatchem). Comparisons between low P supply and adequate P supply (low P/adequate P); and between RAC875 and Wyalkatchem (RAC875/Wyalkatchem) at each P supply. R: RAC875; W: Wyalkatchem; Low P: 10 mg P kg-1 soil (P10), adequate P: 30 mg P kg-1 soil (P30); sem: standard error of the mean (n=4 biological replications). * significant at P<0.05 (t-test); ** significant at P<0.05 with Bonferroni correction (continue).

| Metabolite | | Low P/adequate P | | | | RAC875/Wyalkatchem | | | |
| --- | --- | --- | --- | --- | --- | --- | --- | --- | --- |
| RAC875 | | Wyalkatchem | | P10 | | P30 | |
| P10/ P30 | sem | P10/ P30 | sem | R/W | sem | R/W | sem |
| Glutamic acid | 0.860 | | 0.140 | 0.840 | 0.080 | 0.901 | 0.140 | 0.879 | 0.127 |
| 2- oxo-glutaric acid | 0.765 | | 0.248 | 0.656 | 0.138 | 0.790 | 0.248 | 0.677 | 0.198 |
| Glyceric acid | 1.156 | | 0.042 | 1.363* | 0.055 | 0.772* | 0.042 | 0.910 | 0.140 |
| Glycolic acid | 0.629* | | 0.099 | 1.108 | 0.161 | 0.654 | 0.099 | 1.152 | 0.117 |
| Iso Citric | 1.016 | | 0.021 | 1.070 | 0.061 | 0.893 | 0.021 | 0.941 | 0.079 |
| Itaconate | 0.378* | | 0.127 | 1.053 | 0.232 | 0.468* | 0.127 | 1.305 | 0.166 |
| Maleate | 0.552 | | 0.095 | 1.181 | 0.121 | 0.519* | 0.095 | 1.111 | 0.170 |
| Malic acid | 1.209 | | 0.055 | 1.287* | 0.081 | 0.700* | 0.055 | 0.745 | 0.149 |
| Malonic acid | 1.123 | | 0.089 | 1.095 | 0.126 | 0.705 | 0.089 | 0.687 | 0.200 |
| Nonaoic acid | 1.083 | | 0.024 | 1.179 | 0.057 | 1.066 | 0.024 | 1.161 | 0.097 |
| Pipecolate | 0.568 | | 0.235 | 0.684* | 0.122 | 0.803 | 0.235 | 0.968 | 0.234 |
| Pyruvic acid | 1.084 | | 0.109 | 0.921 | 0.114 | 1.052 | 0.109 | 0.894 | 0.107 |
| Quinic acid | 1.375 | | 0.117 | 1.181 | 0.130 | 0.760 | 0.117 | 0.652 | 0.260 |
| Saccharic acid | 1.058 | | 0.073 | 0.988 | 0.084 | 1.392* | 0.073 | 1.300 | 0.155 |
| Shikimic acid | 1.436 | | 0.090 | 1.151 | 0.114 | 1.313 | 0.090 | 1.053 | 0.133 |
| Succinic acid | 0.944 | | 0.093 | 0.878 | 0.046 | 0.829 | 0.093 | 0.771 | 0.150 |
| Threonic acid | 1.014 | | 0.048 | 1.018 | 0.060 | 0.683* | 0.048 | 0.686* | 0.134 |
| Sugars, Sugar Alcohol and Sugar Phosphates |  | |  |  |  |  |  |  |  |
| 1-kestose | 2.952* | | 0.175 | 2.049* | 0.142 | 2.026* | 0.175 | 1.406 | 0.269 |
| Arabinose | 0.966 | | 0.136 | 1.178* | 0.017 | 0.919 | 0.136 | 1.121 | 0.108 |
| Arabitol | 0.871 | | 0.037 | 1.272 | 0.296 | 0.811 | 0.037 | 1.184 | 0.389 |
| Beta Gentibiose | 1.445 | | 0.182 | 1.431 | 0.321 | 0.727 | 0.182 | 0.720 | 0.113 |
| Fructose | 0.933 | | 0.117 | 0.993 | 0.052 | 0.848 | 0.117 | 0.903 | 0.186 |
| Fructose-6-phosphate | 1.173 | | 0.161 | 0.530* | 0.147 | 1.334 | 0.161 | 0.603 | 0.176 |
| Fucose | 1.041 | | 0.136 | 1.058 | 0.084 | 1.054 | 0.136 | 1.071 | 0.212 |
| Galactinol | 0.996 | | 0.053 | 0.890 | 0.110 | 1.063 | 0.053 | 0.949 | 0.281 |
| Galactose | 0.900 | | 0.140 | 1.003 | 0.062 | 0.835 | 0.140 | 0.930 | 0.204 |
| Galactosylglycerol | 1.531 | | 0.102 | 2.017* | 0.087 | 0.772 | 0.102 | 1.017 | 0.174 |
| Glucose | 0.889 | | 0.141 | 1.014 | 0.060 | 0.826 | 0.141 | 0.942 | 0.207 |
| Glucose-6-phosphate | 1.003 | | 0.126 | 0.492* | 0.149 | 1.306 | 0.126 | 0.641 | 0.174 |
| Inositol myo | 1.015 | | 0.082 | 1.083 | 0.063 | 0.915 | 0.082 | 0.976 | 0.136 |
| Maltose | 1.300 | | 0.097 | 1.468 | 0.033 | 1.016 | 0.097 | 1.148 | 0.230 |
| Mannitol | 1.330 | | 0.164 | 2.374 | 0.398 | 0.695 | 0.164 | 1.240 | 0.392 |
| Mannose | 1.307 | | 0.150 | 1.283* | 0.039 | 1.108 | 0.150 | 1.087 | 0.189 |
| Raffinose | 2.805* | | 0.159 | 2.002 | 0.133 | 1.897* | 0.159 | 1.354 | 0.252 |

Table S 4. Fold-change in metabolite levels in roots of efficient (RAC875) and inefficient (Wyalkatchem). Comparisons between low P supply and adequate P supply (low P/adequate P); and between RAC875 and Wyalkatchem (RAC875/Wyalkatchem) at each P supply. R: RAC875; W: Wyalkatchem; Low P: 10 mg P kg-1 soil (P10), adequate P: 30 mg P kg-1 soil (P30); sem: standard error of the mean (n=4 biological replications). * significant at P<0.05 (t-test); ** significant at P<0.05 with Bonferroni correction (continue).

| Metabolite | | Low P/adequate P | | | | RAC875/Wyalkatchem | | | |
| --- | --- | --- | --- | --- | --- | --- | --- | --- | --- |
| RAC875 | | Wyalkatchem | | P10 | | P30 | |
| P10/ P30 | sem | P10/ P30 | sem | R/W | sem | R/W | sem |
| Rhamnose | 1.087 | | 0.103 | 1.015 | 0.088 | 1.012 | 0.103 | 0.945 | 0.145 |
| Ribitol | 1.017 | | 0.110 | 0.828* | 0.073 | 1.035 | 0.110 | 0.843 | 0.176 |
| Ribose | 1.080 | | 0.095 | 0.989 | 0.094 | 1.027 | 0.095 | 0.941 | 0.159 |
| Sucrose | 1.343 | | 0.075 | 1.046 | 0.048 | 1.180 | 0.075 | 0.919 | 0.101 |
| Trehelose | 0.946 | | 0.072 | 1.001 | 0.083 | 1.090 | 0.072 | 1.153 | 0.167 |
| Xylitol | 0.972 | | 0.085 | 1.013 | 0.080 | 1.031 | 0.085 | 1.074 | 0.128 |
| Xylose | 1.182 | | 0.042 | 1.268* | 0.047 | 0.927 | 0.042 | 0.995 | 0.144 |
| Others |  | |  |  |  |  |  |  |  |
| Benzoic acid, 4-hydroxy- | 0.589* | | 0.123 | 0.938 | 0.149 | 0.679 | 0.123 | 1.079 | 0.135 |
| Glycerol | 0.886 | | 0.082 | 0.952 | 0.091 | 0.882 | 0.082 | 0.947 | 0.183 |
| Glycerol-3-P | 0.547* | | 0.137 | 0.523* | 0.099 | 0.946 | 0.137 | 0.905 | 0.163 |
| Hexadecanoic acid | 1.185 | | 0.047 | 1.208 | 0.064 | 1.128 | 0.047 | 1.150 | 0.118 |
| Monomethylphosphate | 1.321 | | 0.267 | 0.791 | 0.212 | 1.094 | 0.267 | 0.655 | 0.178 |
| Octadecadienoic acid,9,12-Z,Z | 1.443 | | 0.151 | 1.016 | 0.230 | 1.201 | 0.151 | 0.846 | 0.141 |
| Octadecanoic acid, n- | 1.540 | | 0.129 | 1.151 | 0.120 | 1.474 | 0.129 | 1.101 | 0.124 |
| Octadecatrienoic acid, 9,12,15-Z,Z | 1.489 | | 0.133 | 0.980 | 0.303 | 1.014 | 0.133 | 0.668 | 0.093 |
| Phosphoric acid | 0.360** | | 0.056 | 0.358** | 0.072 | 0.727* | 0.056 | 0.724* | 0.098 |
| Threonic acid-1,4-lactone | 0.774 | | 0.050 | 0.834 | 0.082 | 0.583* | 0.050 | 0.629* | 0.156 |
| Urea | 1.460 | | 0.134 | 2.613* | 0.117 | 0.825 | 0.134 | 1.476 | 0.213 |

Table S 5. Effect of P supply on succinic, maleic, oxalic and citric acids of two wheat genotypes RAC875 and Wyalkatchem at 41 days after sowing (DAS). N=5 biological replications.

| Genotype | P supply (mg P kg-1 soil) | Organic acid exudation (µg 15 mL-1) | | | |
| --- | --- | --- | --- | --- | --- |
|  |  | Citrate | Maleate | Oxalic | Succinate |
| RAC875 | 5 | 1.80 | 0.45 | 0.45 | 0.94 |
|  | 10 | 2.40 | 0.32 | 0.30 | 0.86 |
|  | 30 | 1.57 | 0.16 | 0.19 | 0.61 |
| Wyalkatchem | 5 | 2.22 | 0.20 | 037 | 0.84 |
|  | 10 | 3.28 | 0.25 | 0.62 | 1.02 |
|  | 30 | 3.00 | 0.18 | 0.46 | 0.88 |
| F prob |  |  |  |  |  |
| Genotype (G) |  | P=0.031 | P=0.036 | P=0.028 | P=0.337 |
| P treatment (P) |  | P=0.242 | P=0.025 | P=0.285 | P=0.038 |
| G × P |  | P=0.558 | P=0.053 | P=0.074 | P=0.347 |
| F test |  |  |  |  |  |
| dfG |  | 1 | 1 | 1 | 1 |
| dfP |  | 2 | 2 | 2 | 2 |
| dfe |  | 16 | 16 | 16 | 16 |

Table S 6. Effect of P supply on succinic, maleic, oxalic and citric acid concentrations of each wheat genotype, RAC875 and Wyalkatchem at 41 days after sowing (DAS) (One-way Anova analysis). N=5 biological replications.

| Genotype | P supply (mg P kg-1 soil) | Organic acid exudation (µg 15 mL-1) |  |  |  |
| --- | --- | --- | --- | --- | --- |
|  |  | Citrate | Maleate | Oxalic | Succinate |
| RAC875 | 5 | 1.80 | 0.45 | 0.45 | 0.94 |
|  | 10 | 2.40 | 0.32 | 0.30 | 0.86 |
|  | 30 | 1.57 | 0.16 | 0.19 | 0.61 |
| *P* value |  | 0.474 | 0.032 | 0.076 | 0.023 |
|  |  |  |  |  |  |
| Wyalkatchem | 5 | 2.22 | 0.20 | 0.37 | 0.84 |
|  | 10 | 3.28 | 0.25 | 0.62 | 1.02 |
|  | 30 | 3.00 | 0.18 | 0.45 | 0.88 |
| *P* value |  | 0.474 | 0.569 | 0.212 | 0.290 |

Table S 7. Comparisons for succinic, maleic, oxalic and citric acids between P supply of each wheat genotype (one-way Anova, Tukey test)

| Organic acid | Genotype | P supply (mg P kg-1 soil) |  | Mean difference | SE | Sig. |
| --- | --- | --- | --- | --- | --- | --- |
| Citrate | RAC875 | 5 | 10 | -.5992993 | .6999864 | .683 |
|  | RAC875 | 5 | 30 | .2347043 | .6547773 | .932 |
|  | RAC875 | 10 | 30 | .8340036 | .6547773 | .452 |
|  | Wyalkatchem | 5 | 10 | -1.0613014 | .6483639 | .280 |
|  | Wyalkatchem | 5 | 30 | -.7817378 | .6483639 | .479 |
|  | Wyalkatchem | 10 | 30 | .2795636 | .6483639 | .904 |
| Maleate | RAC875 | 5 | 10 | .1354615 | .0918370 | .358 |
|  | RAC875 | 5 | 30 | .2926740* | .0859056 | .027 |
|  | RAC875 | 10 | 30 | .1572126 | .0859056 | .229 |
|  | Wyalkatchem | 5 | 10 | -.0520620 | .0645141 | .708 |
|  | Wyalkatchem | 5 | 30 | .0153483 | .0645141 | .969 |
|  | Wyalkatchem | 10 | 30 | .0674103 | .0645141 | .569 |
| Oxalic | RAC875 | 5 | 10 | .1501093 | .1000124 | .347 |
|  | RAC875 | 5 | 30 | .2584513* | .0935531 | .064 |
|  | RAC875 | 10 | 30 | -.1501093 | .1000124 | .347 |
|  | Wyalkatchem | 5 | 10 | -.2554940 | .1350086 | .196 |
|  | Wyalkatchem | 5 | 30 | -.0858486 | .1350086 | .805 |
|  | Wyalkatchem | 10 | 30 | .1696454 | .1350086 | .452 |
| Succinate | RAC875 | 5 | 10 | .0765738 | .1024566 | .745 |
|  | RAC875 | 5 | 30 | .3292789* | .0958394 | .026 |
|  | RAC875 | 10 | 30 | .2527052 | .0958394 | .076 |
|  | Wyalkatchem | 5 | 10 | -.1781284 | .1539468 | .506 |
|  | Wyalkatchem | 5 | 30 | .0749689 | .1539468 | .879 |
|  | Wyalkatchem | 10 | 30 | .2530973 | .1539468 | .278 |

*Significant difference
